# Supplementary material for: Extracellular endonucleases in the midgut of Myzus persicae may limit the efficacy of orally delivered RNAi
Source: PubMed Central journal article supplement (PMC6695413; doi:10.1038/s41598-019-47357-4), 2019-08-15
Supplement: 41598_2019_47357_MOESM1_ESM.pdf [file 41598_2019_47357_MOESM1_ESM.pdf]

Title:

Extracellular endonucleases in the midgut of *Myzus persicae* may limit the efficacy of orally delivered RNAi

Authors: Amol Bharat Ghodke<sup>1</sup>, Robert Trygve Good<sup>1</sup>, John Golz<sup>1</sup>, Derek A. Russell<sup>2</sup>, Owain Edwards<sup>3</sup>, Charles Robin<sup>1\*</sup>

1. School of BioSciences, The University of Melbourne, Australia
2. Faculty of Veterinary and Agricultural Sciences, The University of Melbourne, Australia
3. Ecosystems Science, CSIRO, Perth, Australia

\* Corresponding author

## Supplementary material:

### Supplementary Figure 1: Phylogeny of vATPase and vATPase-like

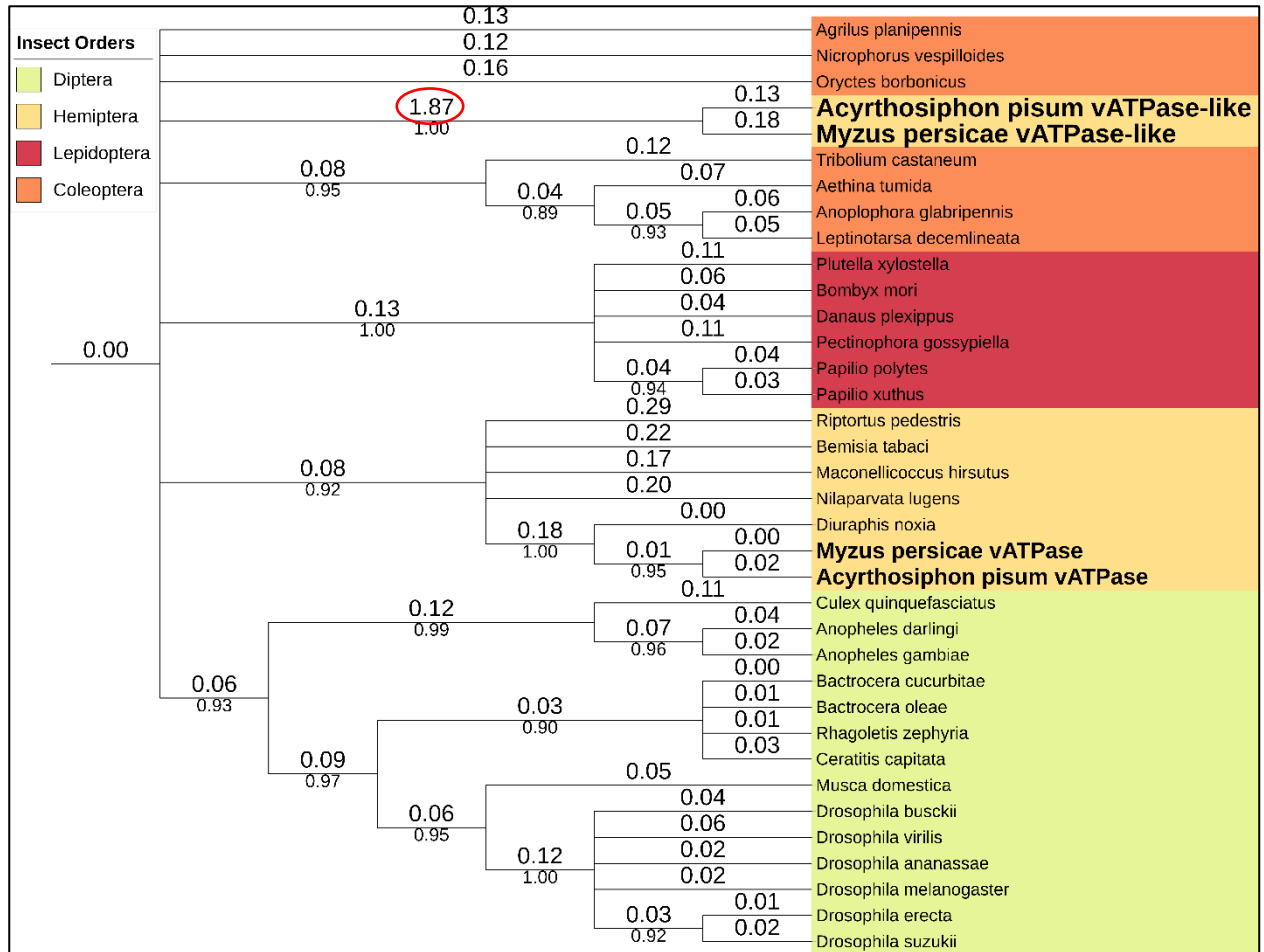

**Supplementary Figure 1** – The aphid genome encodes vATPase and vATPase-like genes. The phylogenetic tree suggests these two genes diverged before hemipteran species radiated. The numbers in small font shown below the branches represent the proportion of bootstrap replicates that support that branch and the numbers in large font above the branches indicate branch lengths. The branch length of the *MP\_vATPase-like* sequence (circled) is long compared to the real vATPase sequences from a diverse range of insects.

## Supplementary Figure 2: *Mp\_C002\_dsRNA* feeding assay

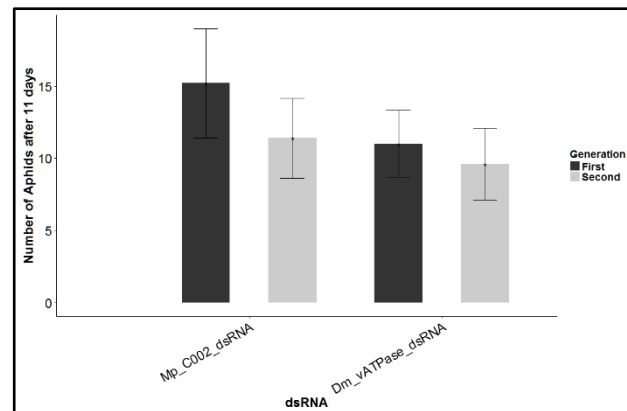

**Supplementary Figure 2: *Mp\_C002\_dsRNA* fed to *Myzus persicae* in the artificial diet does not knockdown the target or affect aphid fecundity even when the experiment spans two generations.** Commercially synthesized *Mp\_C002\_dsRNA* was fed to 5 replicates of 10 - aphids for 11 days and the number of progenies was recorded. dsRNA sequence derived from *Drosophila melanogaster vATPase* was used as a negative control. For each replicate, 10 of the progenies were then transferred to fresh media, and the number of their progeny produced was recorded (Student *t*-test, first generation -  $P=0.37$ , Second Generation -  $P=0.77$ ) The error bars represent the standard error of the mean.

**Supplementary Figure 3: Constructs used in Arabidopsis transformations**

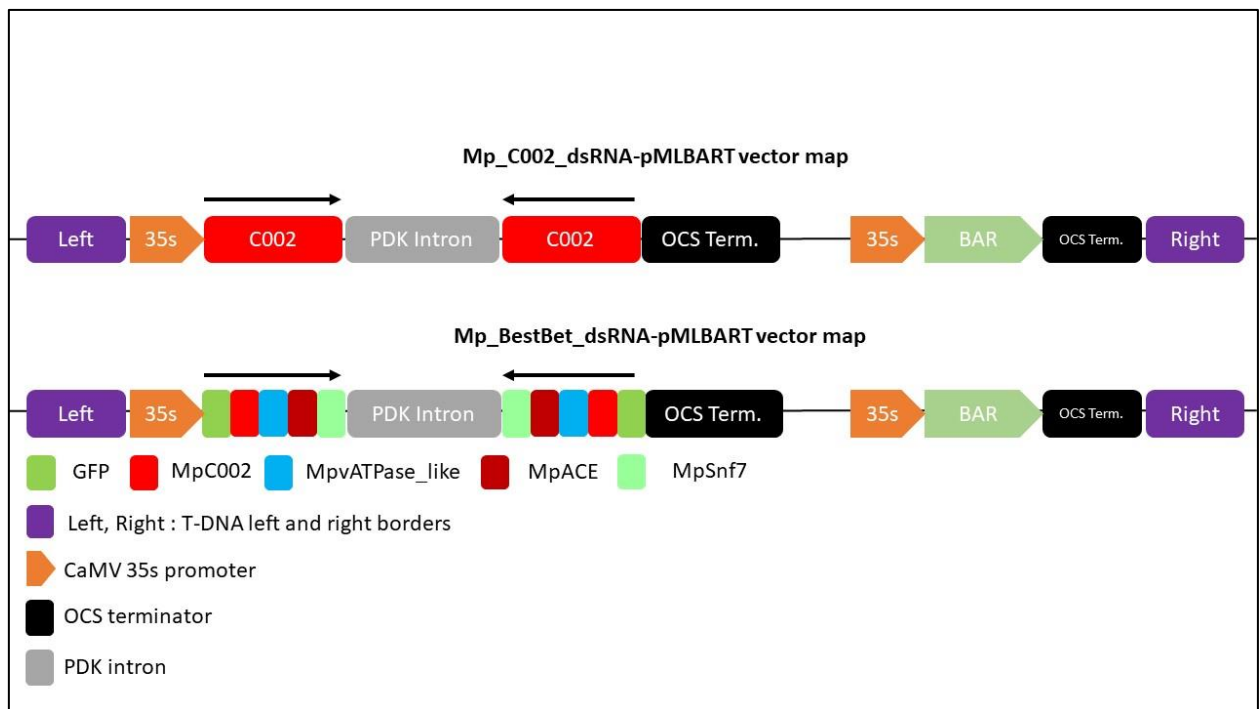

**Supplementary Figure 3 – Plant transformation vector maps.** The vector on the left is designed to express dsMpC002 and the vector on the right is designed to express the multigenic dsBestBet (C002, vATPase-like, Ace, snf7).

Supplementary Figure 4: Phylogeny of Ferritin heavy chain

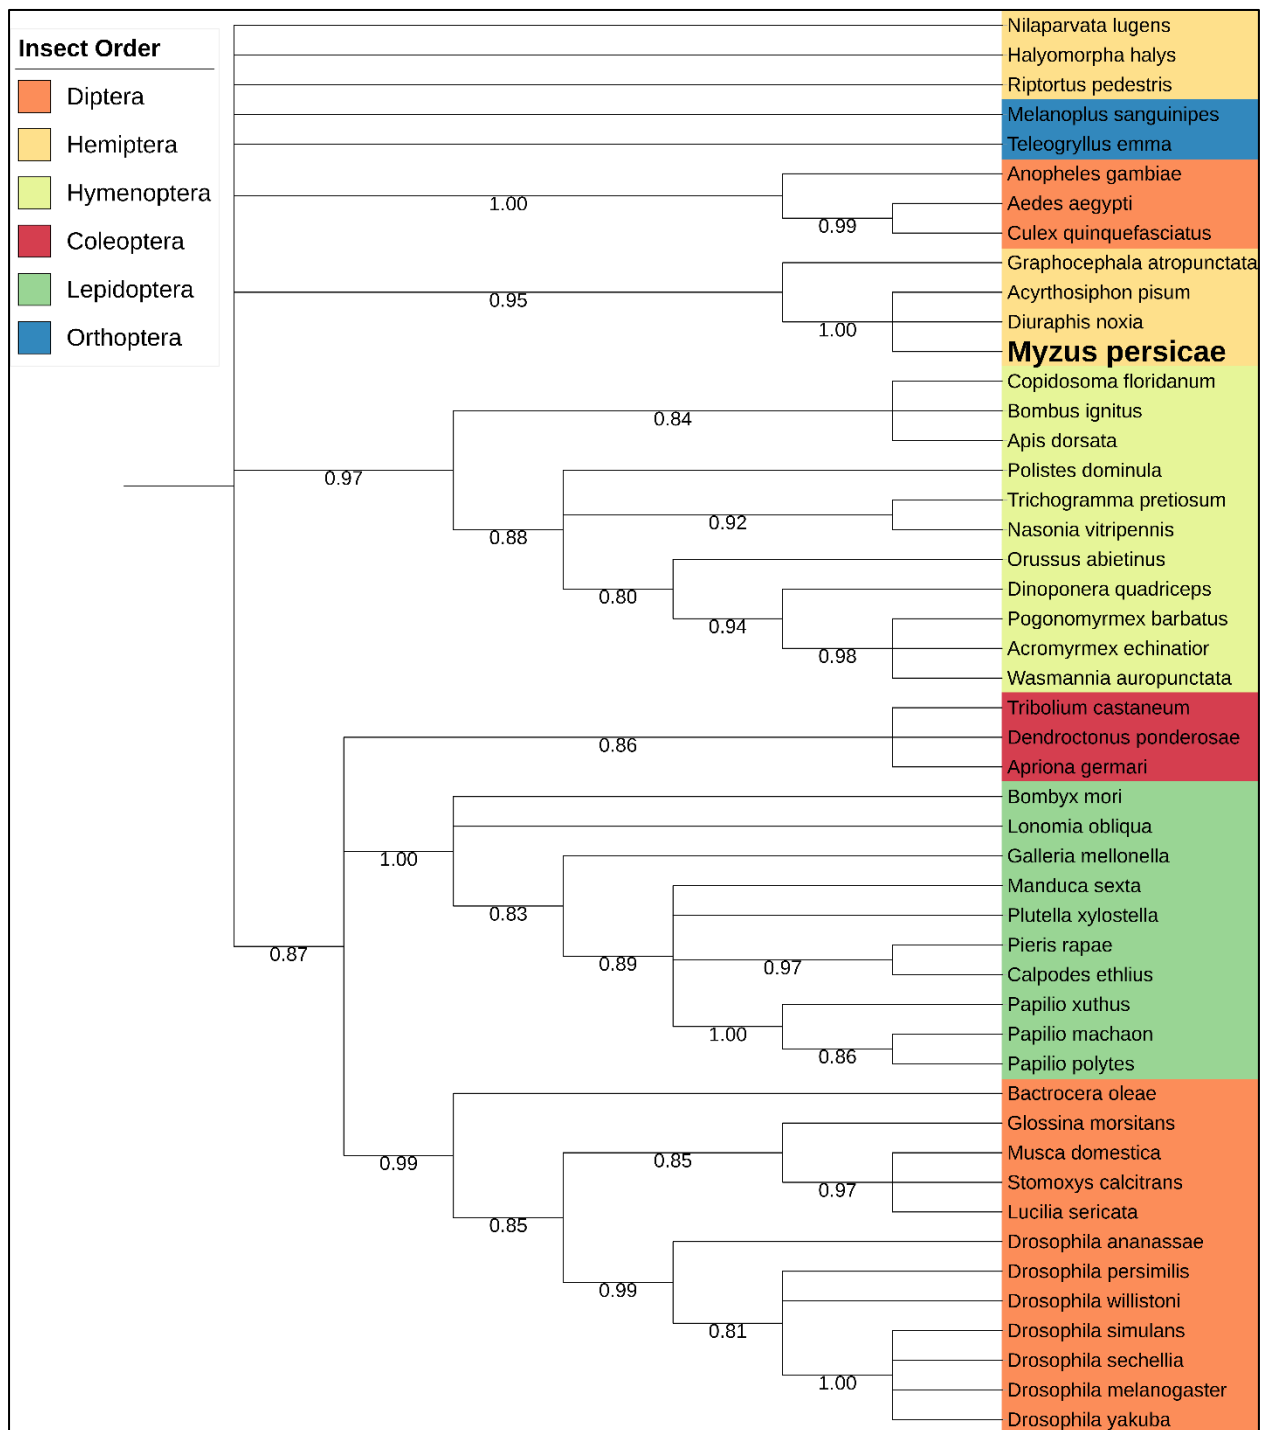

Supplementary figure 4: The phylogeny of ferritin heavy chain genes.

**Supplementary Figure 5**

**Effect of Iron on aphid size –**

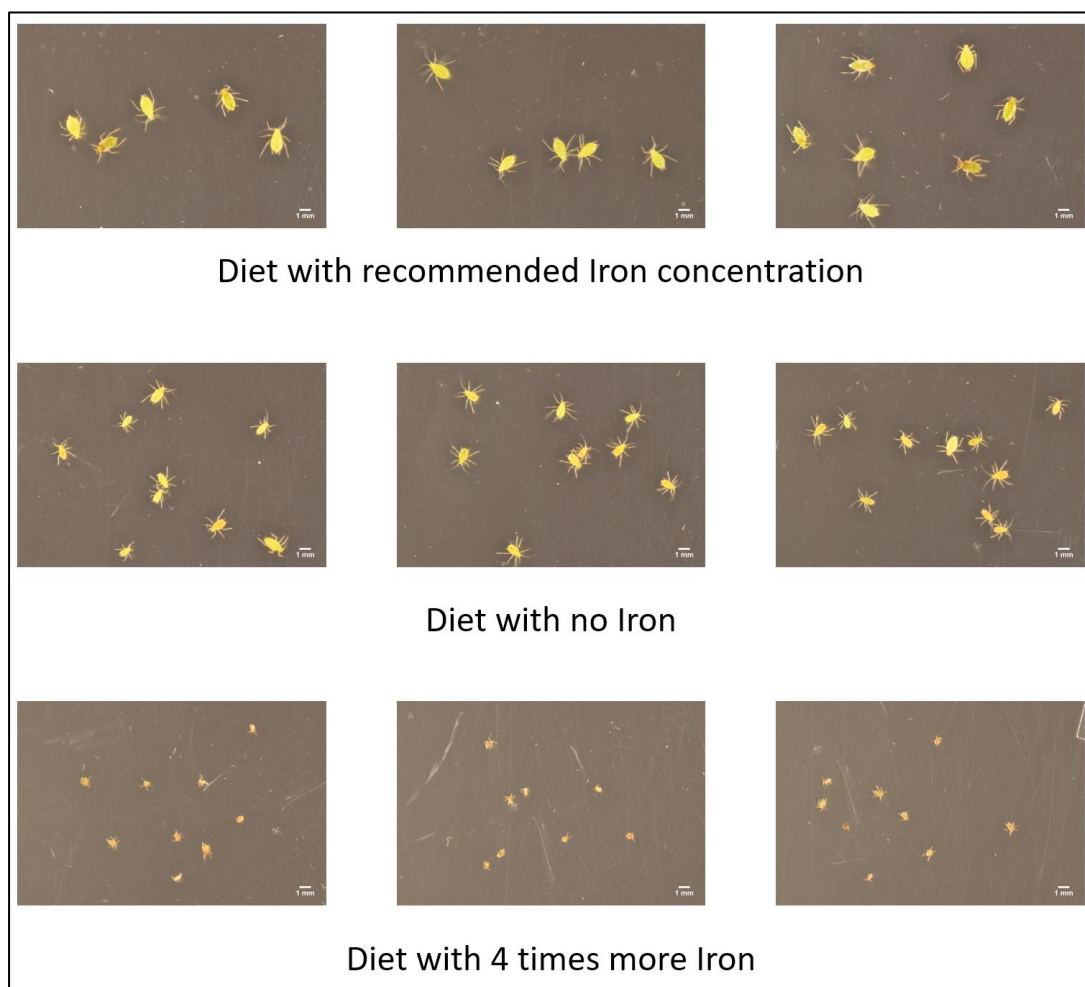

**Supplementary figure 5:** Photographs showing effect of different concentrations of iron on *Myzus persicae* size.

**Supplementary Figure 6: Primers for C002 analysis**

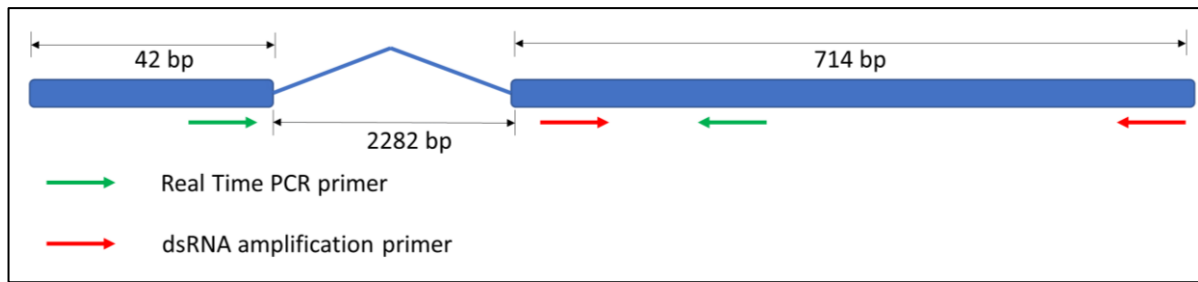

**Supplementary figure 6:** Physical location *dsMP\_C002* primer used for amplification of dsRNA and qRT-PCR analysis.

Supplementary Figure 7: Phylogeny of Endonucleases of insects

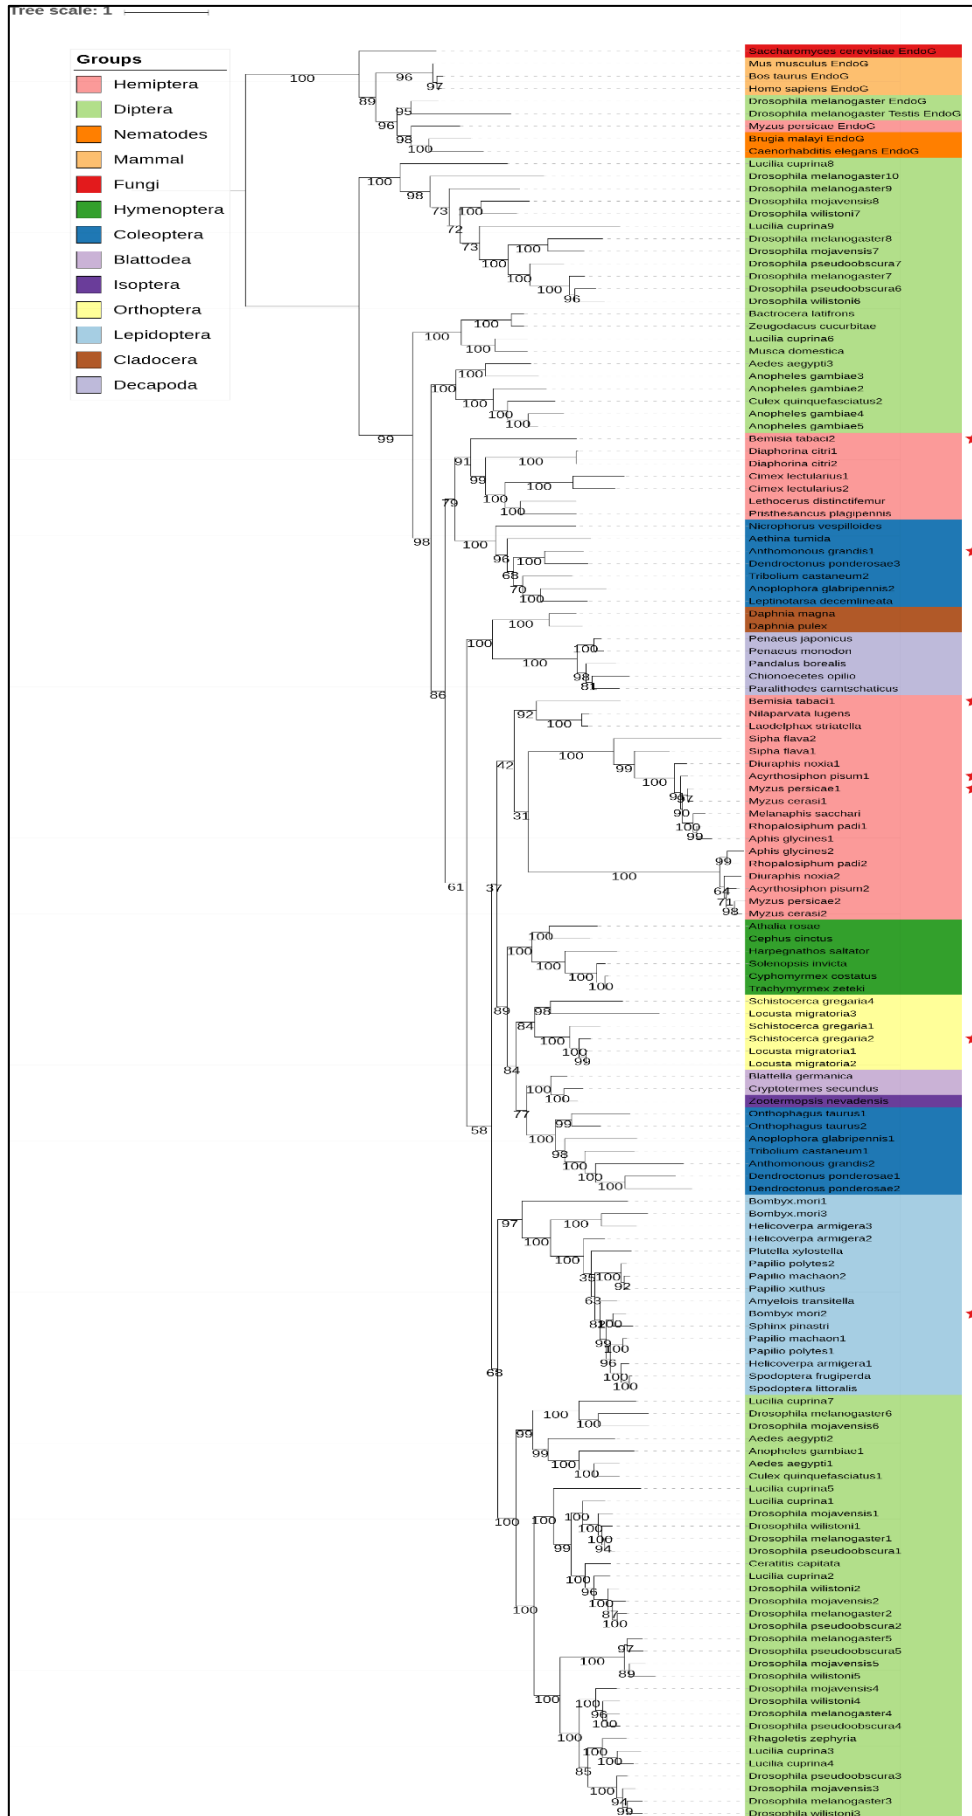



**Supplementary figure 7:** An extended maximum likelihood phylogenetic tree of a subset of insect extracellular endonucleases. Bootstrap scores are shown as percentages. The asterisks represent sequences that have reported dsRNA activity in the literature. The endo-G clade was specified as an outgroup (all accession numbers in supplementary excel sheet1).

**Supplementary Figure 8:** Time course of dsRNA degradation with/without citrate

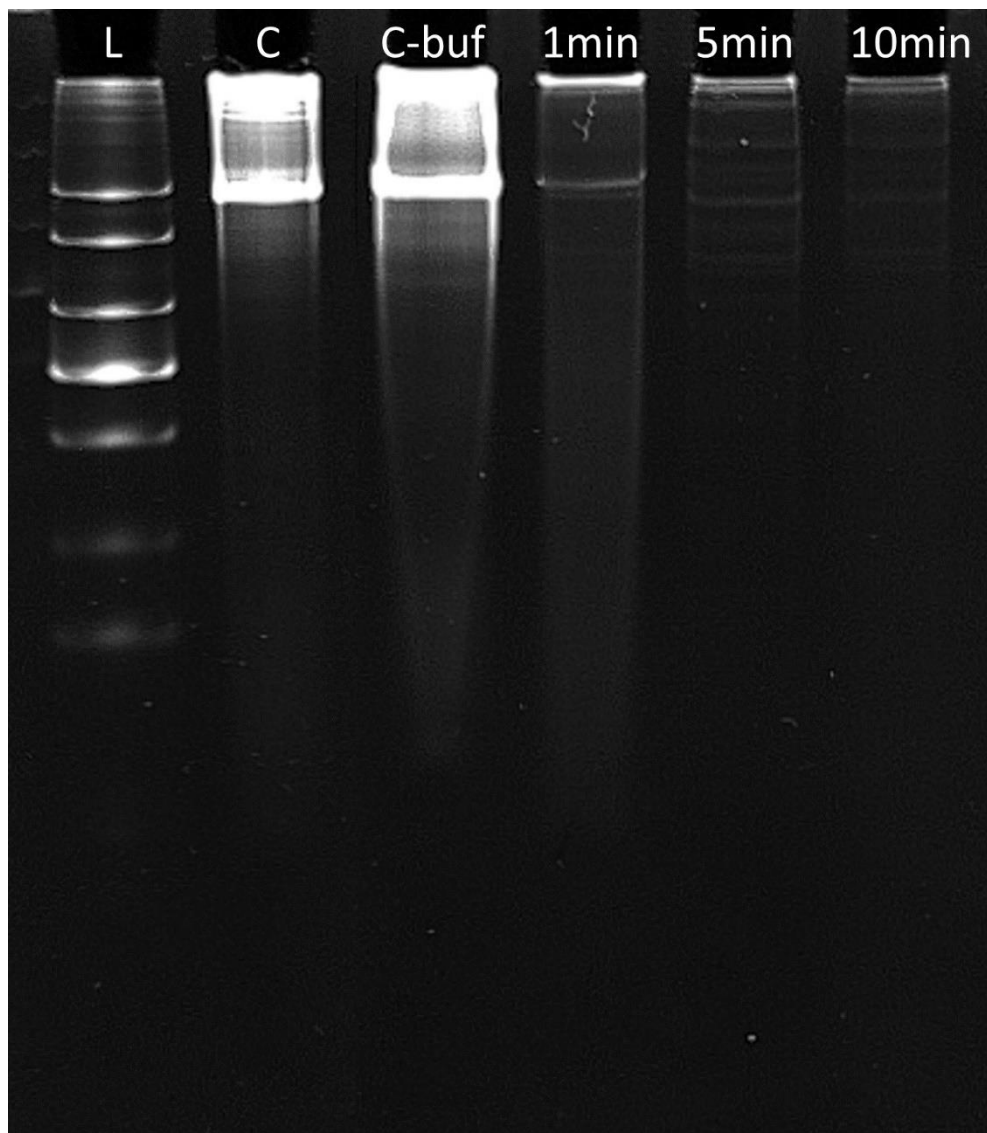

**Supplementary Figure 8:** Inhibition of dsRNA degradation by standard saline citrate that inhibits the action of nuclease. C = Control dsRNA at 0 min, C-buf = dsRNA with neutral saline citrate incubated with *M. persicae* midgut for 15 min, 1min = dsRNA incubated with *M. persicae* midgut for 1 minute, 5min = dsRNA incubated with *M. persicae* midgut for 5 minutes, dsRNA incubated with *M. persicae* midgut for 10 minutes. L = ladder 50bp.

**Supplementary Table 1:**

| Gene Name      | Top blast hit from AphidBase transcript data | Similar Cluster | RPKM and Std Err in MG | RPKM and Std Err in WB |
|----------------|----------------------------------------------|-----------------|------------------------|------------------------|
| MpACE          | MYZPE13164_G006_v1.0_000103290.1             | Cluster-5961.1  | 1.8±0.1                | 2.7±0.1                |
| MpC002         | MYZPE13164_G006_v1.0_000086200.2             | Cluster-32898.1 | 2±0.2                  | 154.4±8.9              |
| MpSnf7         | MYZPE13164_G006_v1.0_000183180.2             | Cluster-23766.0 | 32.7±0.5               | 16.2±0.3               |
| MpvATPase_like | MYZPE13164_G006_v1.0_000172560.3             | Cluster-28471.1 | 9.8±0.2                | 5.4±0.1                |
| MpvATPase      | MYZPE13164_G006_v1.0_000095950.1             | Cluster-21274.0 | 944±39.6               | 178.7±2.6              |
| MpFerritin     | MYZPE13164_G006_v1.0_000072220.2             | Cluster-26442.0 | 1842±285.5             | 255.5±4.7              |
| MpGADPH        | MYZPE13164_G006_v1.0_000000720.1             | Cluster-35712.0 | 2413.6±71              | 1161.8±60.4            |
| MpTubulin      | MYZPE13164_G006_v1.0_000052180.2             | Cluster-37187.0 | 345.8±12.5             | 821.7±29.7             |
| MpRpL7         | MYZPE13164_G006_v1.0_000098680.1             | Cluster-27421.0 | 917.5±38.1             | 635.2±13.4             |

**Supplementary Table 1:** The transcript abundance of genes studied in this manuscript. (MigGut: MB, Whole Body: WB, RPKM: Reads Per Kilobase of transcript per Million mapped reads, Std Err: Standard Error, FC: Fold Change).

**Supplementary data 1:** All the dsRNA sequences and primers used in the study.

**Artificially synthesized dsRNA sequences**

**>Mp\_C002\_dsRNA**

5'TGAACGATAATCAGGGAGAAGAGAACGATAATCAGGGAGAAGAGAACGATAATCAGGGAGAAGAGAACG  
ATAATCAGGGAGAAGAGAAGGAAGAAGTTTTCCGAACCCAGAGATGGAGCACCATCAGTGCGAAGAATACAAA  
TCGAAGATCTGGAACGATGCATTTAGCAACCCGAAGGCTATGAACCTGATGAACTGACGTTTAATACAGCTA  
AGGAATTGGGCTCCAACGAAGTGTGCTCGGACACGACCCGGGCCTATTAACTTCGTCGATGTGATGGCCAC  
CAGCCCGTACGCCACTTCTCGCTAGGTATGTTTAAACAAGATGGTGGCGTTTATTTTGAGGGAGGTGGACACG  
ACATCGGACAAATTTAAAGAGACGAAGCAGGTGGTGCACCGTATCTCGAAACTCCAGAGATCCGTGACTAT  
ATCAGGAACTCGGCCGCCAAGACCGTCGACTTGCTCAAGGAACCCAAGATTAGAGCACGACTGTT 3'

**>Mp\_FeHC\_dsRNA**

5'GGTCCAAATTCCAGACGATTGGATCACCATGGTTGACCCATGCACGAAAAAATGAAAGAGCAGGTCCAGG  
AAGAACTTACTGCAGCAATGACATATTTTGCAATGGGAGCACATTTTTCTAAAGACACAGTGAATCGTCCAGG  
ATTCGCAAAAAATCTTCTTTGATAGTGCCAGCGAAGAACGTGACCATGCTATTAATAATTATTGGATATCTGTTGA  
TGAGAGGAGGTTTGACCAAAGATATCAGTCAATTAATTCGTGACCCTCAACCTTTGTCTGAAGCATGGGCTGA  
TGGTCTAAGTGCATTGAAAGATGCTTTAAATTGGAAGCTCATGTCACTCGTAAGATAAGAGATATTGCCACC  
ACATGTGAGGAACCTGGACGTGATGGACAAGATTTCAACGACTATCATTTAGTTGATTGGTTAACTGGCGATT  
TCTTGACTGAACAATATGAAGGTCAGCGTGACTTAGCT 3'

**>Dm\_vATPase\_dsRNA**

5'AAGGCCAGATCAATCAGAACGTGAGCTGTTTCATCGACGAGAAAGACTTCCTCTCTGCTGATACCTGCGGT  
GGTGTGAGCTGCTGGCCCTCAACGGACGCATCAAGGTGCCCAATACGCTGGAGTCCAGATTAGACCTCATTT  
CGCAGCAGCTGGTGCCCGAGATTCGTAACGCACTTTTCGG 3'

**>Mp\_C002\_dsRNA expressed in Arabidopsis**

5'-

GGGGTACCTGCAAGGTTCAGACTTCCGAACAGGACGATGATCAGGAAGGATATTACGATGATGAGGGAGGA  
GTGAACGATAATCAGGGAGAAGAGAACGATAATCAGGGAGAAGAGAACGATAATCAGGGAGAAGAGAACG  
ATAATCAGGGAGAAGAGAAGGAAGAAGTTTTCCGAACCCAGAGATGGAGCACCATCAGTGCGAAGAATACAAA  
TCGAAGATCTGGAACGATGCATTTAGCAACCCGAAGGCTATGAACCTGATGAACTGACGTTTAATACAGCTA  
AGGAATTGGGCTCCAACGAAGTGTGCTCGGACACGACCCGGGCCTATTAACTTCGTCGATGTGATGGCCAC  
CAGCCCGTACGCCACTTCTCGCTAGGTATGTTTAAACAAGATGGTGGCGTTTATTTTGAGGGAGGTGGACACG  
ACATCGGACAAATTTAAAGAGACGAAGCAGGTGGTGCACCGTATCTCGAAACTCCAGAGATCCGTGACTAT  
ATCAGGAACTCGGCCGCCAAGACCGTCGACTTGCTCAAGGAACCCAAGATTAGAGCACGACTGTTAGAGTG  
ATGAAAGCCTTCGAGAGTCTGATAAAACCAAACGAAAACGAAGCATTAAATCAAACAGAAGATTAAGGGGTTA  
ACCAATGCTCCCGTCAAGTTAGCCAAGGGTGCCATGAAAACGGTTGGACGTTTCTTTAGACATTTTTAACGGA  
ATTC-3'

**>Mp\_Bestbet\_dsRNA expressed in Arabidopsis**

5'-

ACGACGGGAACACAAGACACGTGCTGAAGTCAAGTTTGAGGGAGACACCCTCGTCAACAGGATCGAGCTTA

AGGGAATCGATTTCAAGGAGGACGGAAACATCCTCTAGACTCGAGAGGAATTGGGCTCCAACGAAAGTGTGC  
TCGGACACGACCCGGGCCTTATTTAACTTCGTCGATGTGATGGCCACCAGCCCGTACGCCCACTTCTCGCTAGG  
TATGTTTAAACAAGATGGTGGCGTTTATTTTGAGACGGGCAAAGGTCTGAAGGTCAATGGTTGAAAATACGCTG  
GTAGTGCATTGCTCCATCTCACCCAACAAGCTATACCGTTGATATGCACTGGACTGTTTGGACTGAATCCCAC  
TAGAACTTACTCAAGACATAGATAAGATAGCAACCCGATTGCCACCATGTCGTGCATGAGAGCTGTTGACGCA  
AGTACCATATCCAAAAGCAGTGGAACAGCTATTCCGGTATTTTGGGTTTCCCGTCTGCGCCCACCGTGGAGG  
CGTTCTCCTTCCGGAACACCCGCTGGACATGTTGAAATGGTACAATAATAAACGAGCTGCATTGCAAGCATT  
GAAGCGTAAGAAACGGTACGAACAACAATTAGCCCAAATTGATGGTTCCATGTTAACTATTGAACAACAGCG  
GGAGGCATTAGAAGGTGCCAACACAA-3'

**>Mp\_vATPase\_like\_dsRNA in vitro transcribed**

5'-

TTTAGCCAACACGGGAATGAACATCAAATAAACATTGACCAAGCAACTAAGTTACCGACTCAAGAAATAGGA  
GGCGTCGTGGTCACGGGCAAAGGTCTGAAGGTCAATGGTTGAAAATACGCTGGTAGTGCGATTGCTCCATCTC  
ACCCAACAAGCTATACCGTTGATATGCACTGGACTGTTTG-3'

## Supplementary data 2: All Primers used in this Study

| Aphid qPCR primers                              | Forward                          | Reverse                     |
|-------------------------------------------------|----------------------------------|-----------------------------|
| qMpGAPDH                                        | 5'GTCTCCGACTTCATTGGTGATA3'       | 5'CCACAACACGGTTGGAGTAA3'    |
| qMpRpl7                                         | 5'GGACAACGCATTCCAATCAC3'         | 5'CTTGAATCGACGATCAGCTCTA3'  |
| qMpRplS3                                        | 5'CCATGGGACCAAACAGGTAAA3'        | 5'GGAAGTCTACTTCGGGTTTAG3'   |
| qMpTubulin                                      | 5'CGGTTTCCCGGTCAGTTAAA3'         | 5'CTAGCTGTAAGTGGAGCGAATC3'  |
| qMpActin                                        | 5'CCGAAAGAGGTTACAGCTTCA3'        | 5'TCGAAGTCCAAAGCGACATAG3'   |
| qMpvATPase_like                                 | 5'CTACAGGCGATGTATCAAATCTT3'      | 5'TGATGTTTATTCCCGTGTTG3'    |
| qMpC002                                         | 5'GCTCAAGGAACCCAAGATTAGA3'       | 5'TAACTTGACGGGAGCATTGG3'    |
| qMpFerritin                                     | 5'CTGGACGTGATGGACAAGATT3'        | 5'AAGTCACGCTGACCTTCATATT3'  |
| <b>Arabidopsis primers for internal control</b> |                                  |                             |
| qCyclophilin_AT                                 | 5'CACTGGACCAGGTGTACTTTC3'        | 5'ACCACATGCCTTCCATCTAAC3'   |
| qTCTP_AT                                        | 5'ACACCCAAGCTCAGCGAAGAA3'        | 5'CATGCATACCCTCCCAACAA3'    |
| qTubulin_AT                                     | 5'CATTGCTTCGGTACACTCCA3'         | 5'CCAGGGAACCTAAGACAGCA3'    |
| qActin_AT                                       | 5'TCTTCCGCTCTTTCTTCCA3'          | 5'TCCTTCTGGTTCATCCCAAC3'    |
| <b>Digital PCR Primers and probes</b>           |                                  |                             |
| MpRpl7_digi                                     | 5'AATGAACTTCCTTTGGCCTTTC3'       | 5'GTTAATGGTATCTTCACGGTTTC3' |
| MpRpl7_digi_Probe                               | 5'GATTGGTCTTCTTACGCCAGCCTCC3'    |                             |
| MpC002_digi                                     | 5'CCATCAGTGCGAAGAATACAAATC3'     | 5'GTTGGAGCCCAATTCCTTAGC3'   |
| MpC002_digi_Probe                               | 5'TCAGGTTTATAGCCTTCGGGTTGC3'     |                             |
| MpvATPase_like_digi                             | 5'CTACAGGCGATGTATCAAATCTT3'      | 5'TGATGTTTATTCCCGTGTTG3'    |
| MpvATPase_like_probe                            | 5'TACCAGACGACGTGGAGTACGTGA3'     |                             |
| MpACE_digi                                      | 5'ATGGAAGCGTTCACCAGATT3'         | 5'TCCGTAACCTACGTGCAATTC3'   |
| MpACE_digi_prob                                 | 5'CTGTCTCAGATGACATAGATTGGCCACT3' |                             |
| MpSnf7_digi                                     | 5'GGAAGTATGTAGACGAGGATG3'        | 5'GCTCAAATGTTGGAAGTGAAGG3'  |
| MpSnf7_digi_prob                                | 5'AGGCAAGACACCTGTCCA3'           |                             |

**Supplementary data 3:** Custom commands used in bioinformatics analysis pipeline.

**Custom Bioinformatics Commands –**

**Trimmomatic**

```
java -jar trimmomatic-0.33.jar PE -threads 14 <fastq_file_R1>  
<fastq_file_R2> fastq_paired_R1.fastq fastq_unpaired_R1.fastq  
fastq_paired_R2.fastq fastq_unpaired_R2.fastq ILLUMINACLIP:TruSeq3-  
PE-2.fa:2:30:10 LEADING:3 TRAILING:3 MINLEN:40
```

**STAR –**

```
STAR --runThreadN 16 --runMode alignReads --sjdbGTFfile <GTF_file> -  
-sjdbOverhang 99 --outSAMstrandField intronMotif --twopassMode Basic  
--quantMode GeneCounts --readFilesIn <Read_1.fastq> <Read_2.fastq> -  
-outFilterMatchNminOverLread 0.4 --outFilterScoreMinOverLread 0.2 --  
outReadsUnmapped Fastx --limitBAMsortRAM 8729257684 --genomeDir . --  
outSAMtype BAM SortedByCoordinate --outSAMunmapped Within --  
outFilterIntronMotifs RemoveNoncanonical > star.log
```

**Supplementary data 4:** Link for aphid size detection script at GitHub.

Link - [https://github.com/amoltej/Aphid\\_Ruler](https://github.com/amoltej/Aphid_Ruler)

**Supplementary data 5:** Sequence accession numbers used in phylogenetic study

| <b>Name of sequence</b>              | <b>Accession number</b> |
|--------------------------------------|-------------------------|
| Myzus persicae EndoG                 | XP_022164839.1          |
| Drosophila melanogaster EndoG        | NP_610737.1             |
| Caenorhabditis elegans EndoG         | T28787                  |
| Brugia malayi EndoG                  | XP_001892352.1          |
| Homo sapiens EndoG                   | AAP88743.1              |
| Bos taurus EndoG                     | NP_787017.1             |
| Mus musculus EndoG                   | NP_031957.1             |
| Drosophila melanogaster Testis EndoG | ACN22207.1              |
| Saccharomyces cerevisiae EndoG       | NP_012327.1             |
| Aedes aegypti1                       | EAT42072.1              |
| Culex quinquefasciatus1              | XP_001858177.1          |
| Anopheles gambiae1                   | XP_309696.2             |
| Aedes aegypti2                       | XP_001648469.1          |
| Drosophila wilistoni1                | XP_002068162.1          |
| Drosophila melanogaster1             | NP_649078.1             |
| Drosophila pseudoobscura1            | XP_001352914.1          |
| Drosophila mojavensis1               | XP_002008430.1          |
| Lucilia cuprina1                     | KNC28514.1              |
| Drosophila wilistoni2                | XP_002068164.1          |
| Drosophila melanogaster2             | NP_649076.1             |
| Drosophila pseudoobscura2            | XP_001352912.1          |
| Drosophila mojavensis2               | XP_002008429.1          |
| Lucilia cuprina2                     | XP_023303709.1          |
| Ceratitis capitata                   | XP_004530585.1          |
| Drosophila wilistoni3                | XP_002062101.1          |
| Drosophila mojavensis3               | XP_002008700.1          |
| Drosophila pseudoobscura3            | XP_002021311.1          |
| Drosophila melanogaster3             | NP_648610.1             |
| Drosophila wilistoni4                | GK16832c                |
| Drosophila pseudoobscura4            | XP_001353493.2          |
| Drosophila melanogaster4             | ABC86341.1              |
| Drosophila mojavensis4               | GI13641c                |
| Rhagoletis zephyria                  | XP_017478492.1          |
| Lucilia cuprina3                     | XP_023306795.1          |
| Lucilia cuprina4                     | XM_023451027.1          |
| Drosophila wilistoni5                | GK16832b                |
| Drosophila mojavensis5               | GI13641b                |
| Drosophila pseudoobscura5            | GA12772b                |
| Drosophila melanogaster5             | CG14120b                |
| Lucilia cuprina5                     | XP_023303878.1          |
| Athalia rosae                        | XP_012258516.1          |
| Cephus cinctus                       | XP_015605998.1          |
| Onthophagus taurus1                  | XP_022903813            |
| Onthophagus taurus2                  | XP_022903812            |
| Blattella germanica                  | PSN57821.1              |
| Zootermopsis nevadensis              | KDR18788.1              |
| Cryptotermes secundus                | XP_023717429.1          |
| Schistocerca gregaria1               | KJ135008                |
| *Schistocerca gregaria2              | KJ135009                |
| Locusta migratoria1                  | APF31794                |
| Locusta migratoria2                  | ARW74135                |

|                            |                        |
|----------------------------|------------------------|
| Trachymyrmex zeteki        | XP_018306713.1         |
| Cyphomyrmex costatus       | KYM98744.1             |
| Solenopsis invicta         | XP_011156845.1         |
| Harpegnathos saltator      | EFN78781.1             |
| Tribolium castaneum1       | D6WCE2                 |
| Anoplophora glabripennis1  | XM_018724288.1         |
| Nilaparvata lugens         | XP_022200679           |
| Laodelphax striatella      | AKB95592               |
| *Bemisia tabaci1           | KX390872               |
| Drosophila ponderosae1     | N6UQ21                 |
| Drosophila ponderosae2     | N6UIT3                 |
| Anthomonous grandis2       | Agranuc1               |
| Schistocerca gregaria4     | KJ135011               |
| Sphinx pinastri            | Sphinx_pinastriC433742 |
| *Bombyx mori2              | AB254196               |
| Papilio machaon1           | XM_014500085.1         |
| Papilio polytes1           | XM_013279368.1         |
| Spodoptera frugiperda      | CAR92521.1             |
| Spodoptera littoralis      | CAR92522.1             |
| Helicoverpa armigera1      | XM_021336132           |
| Amyelois transitella       | XM_013330480.1         |
| Papilio machaon2           | XP_014355571.1         |
| Papilio xuthus             | XM_013315183.1         |
| Papilio polytes2           | XM_013283730.1         |
| Helicoverpa armigera2      | XM_021336155           |
| Plutella xylostella        | XM_011571062.1         |
| Helicoverpa armigera3      | XM_021335286           |
| Bombyx.mori3               | XP_004922835           |
| Daphnia pulex              | EFX68769.1             |
| Daphnia magna              | KZS08845.1             |
| Bombyx.mori1               | AK383943.1             |
| Chionoecetes opilio        | BAI79321.2             |
| Paralithodes camtschaticus | AAN86143.1             |
| Penaeus japonicus          | CAB55635.1             |
| Penaeus monodon            | DQ528804.2             |
| Pandalus borealis          | CBG22733.1             |
| Aedes aegypti3             | XP_021699422.1         |
| Anopheles gambiae3         | XP_315045.4            |
| Anopheles gambiae4         | XP_320812.4            |
| Anopheles gambiae5         | XP_320813              |
| Culex quinquefasciatus2    | XP_001859639.1         |
| Anopheles gambiae2         | XP_320813.4            |
| Tribolium castaneum2       | EEZ98722               |
| Leptinotarsa decemlineata  | XM_023168151           |
| Anoplophora glabripennis2  | XM_023455638           |
| Drosophila ponderosae3     | XM_019907742           |
| *Anthomonous grandis1      | Agranuc2               |
| Aethina tumida             | XM_020014593           |
| Nicrophorus vespilloides   | XM_017918580           |
| Locusta migratoria3        | ARW74134               |
| Pristhesancus plagipennis  | AQM58352               |
| Lethocerus distinctifemur  | ATU82404               |



|                           |                |
|---------------------------|----------------|
| Cimex lectularius1        | XP_014241376   |
| Cimex lectularius2        | XP_014241898   |
| Diaphorina citri1         | XP_008483860   |
| Diaphorina citri2         | XP_008483858   |
| *Bemisia tabaci2          | AQU43107       |
| Musca domestica           | XP_005182498.1 |
| Lucilia cuprina6          | XP_023293712.1 |
| Bactrocera latifrons      | XP_018802082.1 |
| Zeugodacus cucurbitae     | XP_011187184.1 |
| Drosophila mojavensis6    | XP_002008704.2 |
| Drosophila melanogaster6  | NP_648612.1    |
| Lucilia cuprina7          | FF38_05889     |
| Diaphorina citri3         | XP_017297751.1 |
| Diuraphis noxia1          | XP_015375167.1 |
| **Myzus persicae1         | XP_022183034.1 |
| Myzus cerasi1             | Mca21568.t1    |
| *Acyrtosiphon pisum1      | XP_003242652.1 |
| Rhopalosiphum padi1       | Rp154-scaffold |
| Melanaphis sacchari       | XP_025194442.1 |
| Aphis glycines1           | AG012784       |
| Sipha flava1              | XP_025416859.1 |
| Sipha flava2              | XP_025421666.1 |
| Myzus persicae2           | XP_022181213.1 |
| Diuraphis noxia2          | XM_015519681.1 |
| Acyrtosiphon pisum2       | XP_003248225.1 |
| Aphis glycines2           | AG007731       |
| Rhopalosiphum padi2       | Rp463-scaffold |
| Myzus cerasi2             | Mca00011.t1    |
| Drosophila pseudoobscura6 | XP_001357871.2 |
| Drosophila melanogaster7  | NP_001034074.1 |
| Drosophila wilsoni6       | XP_002070514.1 |
| Drosophila pseudoobscura7 | XP_002137045.2 |
| Drosophila mojavensis7    | XP_002004969.1 |
| Drosophila melanogaster8  | NP_610558.2    |
| Drosophila wilsoni7       | EDW81498.2     |
| Drosophila mojavensis8    | XP_002001066.2 |
| Drosophila melanogaster9  | NP_996301.2    |
| Drosophila melanogaster10 | NP_651627.1    |
| Lucilia cuprina8          | XP_023306757.1 |
| Lucilia cuprina9          | XP_023292190.1 |
